# Supplementary material
Source: PubMed Central journal article supplement (PMC4679496)

1 **SUPPORTING INFORMATION**

2 **Increased expression of the epithelial anion transporter Pendrin/SLC26A4 in nasal polyps**  
3 **of patients with Chronic Rhinosinusitis**

4  
5 **Sudarshan Seshadri, PhD<sup>1\*</sup>, Xiang Lu, MD.PhD<sup>1,2\*</sup>, Matthew R. Purkey, BS<sup>1</sup>, Tetsuya**  
6 **Homma, MD<sup>1</sup>, Andrew Wonho Choi, BS<sup>1</sup>, Roderick Carter, BS<sup>1</sup>, Lydia Suh, BSc<sup>1</sup>, James**  
7 **Norton, MS<sup>1</sup>, Kathleen E. Harris, MS<sup>1</sup>, David B. Conley, MD<sup>3</sup>, Atsushi Kato, PhD<sup>1</sup>, Pedro**  
8 **C. Avila, MD<sup>1</sup>, Barbara Czarnocka, PhD<sup>4</sup>, Peter A Kopp, MD<sup>5</sup>, Anju T Peters, MD<sup>1</sup>, Leslie**  
9 **C Grammer, MD<sup>1</sup>, Rakesh K. Chandra, MD<sup>3</sup>, Bruce K. Tan, MD<sup>3</sup>, Zheng Liu, MD<sup>2</sup>,**  
10 **Robert C. Kern, MD<sup>3</sup>, Robert P. Schleimer, PhD<sup>1,3</sup>**

11  
12 <sup>1</sup>Division of Allergy and Immunology, Northwestern University Feinberg School of Medicine,  
13 Chicago, IL, USA

14 <sup>2</sup>Department of Otolaryngology, Tongji Hospital, Tongji Medical College, Huazhong University  
15 of Science and Technology, Wuhan, PR China

16 <sup>3</sup>Department of Otolaryngology—Head and Neck Surgery, Northwestern University Feinberg  
17 School of Medicine, Chicago, IL, USA

18 <sup>4</sup> Department of Biochemistry and Molecular Biology, The Centre of Postgraduate Medical  
19 Education, Marymoncka 99/103, Warsaw 01-813, Poland

20 <sup>5</sup>Division of Endocrinology, Metabolism, and Molecular Medicine, Northwestern University  
21 Feinberg School of Medicine, Chicago, IL, USA

22 \* These authors contributed equally.

23 **Funding:** This research is supported in part by NIH grants R37HL068546, R01HL078860 and  
24 P01AI106683 and also a grant from Ernest S. Bazley Trust.

25 Address correspondence to Dr. Robert P. Schleimer, Ph.D.,  
26 Division of Allergy and Immunology, Northwestern University Feinberg School of Medicine,  
27 240 E Huron St., McGaw- Rm #M-318, Chicago, IL 60611 USA.  
28 Phone: 312-503-0076; FAX: 312-503-0078; E-mail: rpschleimer@northwestern.edu  
29

## 30 **METHODS**

### 31 **Cell Culture**

32 NECs were collected during surgery and cultured under air-liquid interface (ALI) conditions<sup>1</sup>.  
33 NECs were first plated in a single well of a 6-well culture plate coated with collagen (Vitrogen;  
34 Collagen Biomaterials, Palo Alto, CA) for expansion. After reaching confluence, cells were  
35 trypsinized and plated in 0.4µm pore membrane inserts of a 12-well transwell plate (Costar,  
36 Corning, NY). Cells were grown in Bronchial Epithelial Growth media (BEGM) (Lonza) with  
37 media on apical and basal side until they reached confluence. Confluent cells were then cultured  
38 under ALI conditions. Apical media was removed and the basal media was replaced with ALI  
39 media containing BEBM/Dulbecco's modified Eagle's medium (DMEM) supplemented with  
40 BEGM SingleQuot kit (Lonza) and additional bovine serum albumin (1.5 µg/ml) and retinoic  
41 acid ( $5 \times 10^{-8}$  M) (Sigma-Aldrich (St. Louis, MO)) to induce differentiation. The ALI medium  
42 was changed 3 times a week for 3 weeks. After 21 days, cells were changed to ALI media without  
43 hydrocortisone for 48h and then used for experiments. For stimulation with cytokines, ALI media  
44 with cytokines were added apically (50 µl) and basally (950 µl) and cells were stimulated for 24h  
45 for experiments evaluating RNA and 48h for experiments evaluating protein. In some  
46 experiments, to mimic chronic cytokine exposure, NECs were stimulated with cytokines for one  
47 week. Media containing cytokines was changed on days 2 and 4 and the cells were harvested on  
48 day 7 for assessment of RNA and protein. For dexamethasone experiments, cells were first  
49 pretreated with dexamethasone or DMSO for 1h and then stimulated with cytokines as indicated  
50 for further 24h. Cells were then harvested in RNA lysis buffer containing β-mercaptoethanol.

### 51 **Real-time PCR**

52 Total RNA from sinonasal tissue was extracted using QIAzol (Qiagen, Valencia, CA)  
53 using RNeasy purification system according to manufacturer's instructions. NECs

54 (scrapings and ALI cultured) were lysed in RNA lysis buffer supplemented with  
55  $\beta$ -mercaptoethanol and RNA was extracted according to the manufacturer's protocol  
56 (Clontech, Mountain View, CA). DNA contamination was eliminated by treatment of  
57 RNA with DNase I during purification. Good quality RNA from scraping cells, as  
58 determined using a agilent bioanalyzer (Agilent Technologies, Santa Clara, CA), was  
59 used for real-time PCR. One microgram of RNA was converted to single-strand  
60 cDNA using SuperScript II reverse transcriptase system (Invitrogen, Carlsbad, CA)  
61 using random primers. Semi-quantitative real-time RT-PCR was performed with a  
62 TaqMan method using an Applied Biosystems 7500 Sequence Detection System  
63 (Applied Biosystems, Foster City, CA) in 15  $\mu$ l reactions (7.5  $\mu$ l of 2x TaqMan Gene  
64 Expression Master mix (Applied Biosystems), 0.75  $\mu$ l of 20x primer/probe mix and 5  
65  $\mu$ l of 2 ng/ $\mu$ l cDNA). All primers/probes were purchased from Applied Biosystems.  
66 Median expression of GUSB (Human  $\beta$ -glucuronidase endogenous control, PN;  
67 4326320E) was used for normalizing gene expression. Exact copy number of the  
68 target genes was determined by running serial dilutions of quantified PCR product  
69 of the target gene as standards in the PCR reaction. Target gene expression was  
70 expressed as copies/ng of total RNA. In some experiments, the delta-CT method was  
71 used to assess gene expression.

72

### 73 **Extraction of proteins from sinus tissue and cultured epithelial cells**

74 Tissue proteins were extracted as described in Peters, A.T. et al <sup>2</sup>. Briefly, tissues were cut into  
75 small pieces and resuspended in PBS containing 0.05% tween 20 supplemented with a protease  
76 inhibitor cocktail (Sigma). Tissues were lysed in a Bullet Blender (Next Advance) with 1.6 mm

77 stainless steel beads for 4 minutes twice at setting 7. Tissue lysates were centrifuged at 1968 x g  
78 to clear the debris. Tissue lysates were stored at -20°C until further use. Proteins from cultured  
79 cells were extracted using RIPA buffer (50 mM Tris pH 7.4, 1% SDS, 1mM EDTA, 150 mM  
80 NaCl, 0.25% Sodium deoxycholate with protease and phosphatase inhibitors). Protein  
81 concentrations in all samples were determined using a BCA assay (Thermoscientific) following  
82 the manufacturer's protocol. Proteins in the preparation were resolved on 4-12% Bis-Tris gel  
83 (Life Technologies, Carlsbad, CA), and transferred to a polyvinyl difluoride membrane for  
84 immunoblotting. Membranes were incubated with affinity purified pendrin PP1 (1.0 µg/ml) and  
85 actin antibody (1:10,000; MP Biomedicals, clone C4). The PP1 antibody is directed against the  
86 first 15 amino acids at the N-terminal of the protein. This antibody has been previously described  
87 in detail and has been used by other groups to characterize pendrin<sup>3,4</sup>. After washing, blots were  
88 incubated with appropriate secondary antibody (Li-Cor Biosciences, Lincoln, NE). To quantify  
89 pendrin protein in tissue extracts, immunoblots were digitalized and quantified with Odyssey  
90 imaging software (Li-Cor Biosciences, Lincoln, NE). Densitometry values for pendrin were  
91 normalized to those of the housekeeping gene β-actin.

## 92 **Immunohistochemistry**

93 Immunohistochemistry was performed as described in Peters, A.T. et al <sup>2</sup>. Briefly, nasal tissue  
94 was dehydrated, infiltrated, and embedded with paraffin, and tissue was sectioned at 3 µm by  
95 using a Leica RM2245 Cryostat (Leica Microsystems Inc.; Bannockburn, IL). All sections were  
96 de-paraffinized and rehydrated; tissue sections were boiled for 20 minutes in citrate-based buffer  
97 for antigen unmasking (pH 6.0; Vector Laboratories; Burlingame, CA). All sections were then  
98 blocked for endogenous peroxidase activity with 3% H<sub>2</sub>O<sub>2</sub>/methanol. After rinsing, sections were  
99 treated to block nonspecific binding with 5% goat serum/0.3% Tween-20/PBS. Tissue sections  
100 were then incubated overnight at 4°C with 0.03 µg/ml of rabbit anti-human pendrin antibody or

101 control rabbit IgG. Sections were rinsed and then incubated with biotinylated secondary goat  
102 anti-rabbit antibody (Vector Laboratories) at a 1:500 dilution for 1 hour at room temperature.  
103 After another rinse, sections were incubated in ABC reagent (avidin–biotin–horseradish  
104 peroxidase complex, Vector Laboratories) for 1 hour at room temperature. Sections were rinsed  
105 again and incubated in diaminobenzidine (DAB) reagent (Invitrogen) for 10 minutes at room  
106 temperature. They were then rinsed in deionized H<sub>2</sub>O, counterstained with hematoxylin,  
107 dehydrated, cleared, mounted, and coverslipped by using Cytoseal 60 (Richard-Allan Scientific;  
108 Kalamazoo, MI) in preparation for microscopic analysis.

109 Sections were observed using an Olympus IX71<sup>®</sup> Inverted Microscope at a magnification of  
110 200X and a MicroFire AR digital microscope camera (Optronics; Goleta, CA).

111

112

113

114

115

116

117

118

119

120

121

122

123

124

125 **FIGURE LEGENDS**

126

127 **Figure E1.**

128 **Pendrin peptide blocked detection of pendrin by pendrin specific antibody in sinonasal**  
129 **tissues.**

130 Total protein (30 µg) from sinonasal tissues and recombinant pendrin were separated by gel  
131 electrophoresis. Proteins were transferred to PVDF membrane. Membranes were then incubated  
132 with pendrin antibody premixed with PBS or pendrin peptide overnight. Blots were developed  
133 following normal immunoblot protocol. Blot shown is representative from at least 2 experiments  
134 using different sinonasal tissues from multiple donors.

135

136 **Figure E2.**

137 **A trend towards increased pendrin expression in polyp epithelial cells compared to**  
138 **uncinate control epithelial cells.**

139 Nasal Scraping epithelial cells (NECs) from control, CRSsNP, CRSwNP (uncinates) and polyps  
140 were obtained during surgery. RNA was isolated and the expression of pendrin in NECs was  
141 analyzed using real-time PCR.

142

143 **Figure E3.**

144 **Periostin expression was increased in nasal polyps of patients with CRS and periostin**  
145 **expression correlated with IL-13 expression in sinonasal tissues.**

146 Expression of periostin in sinonasal tissues was analyzed by real-time PCR (A). The relationship  
147 between expression of periostin and IL-13 in sinonasal tissues was analyzed using a Spearman  
148 Rank Correlation (B). Data for IL-13 was used from figure 4. \* p<0.05, \*\*\*p<0.001

149

**150 Figure E4.**

**151 Expression of pendrin mRNA was increased by Th2 cytokines and IL-17 stimulation in a**  
**152 dose dependent manner in differentiated airway epithelial cells.**

153 Differentiated nasal epithelial cells (NECs) were untreated (CTL) or stimulated with increasing  
154 concentrations (0.1 -50 ng/ml) of cytokines as indicated for 24 h. Pendrin gene expression was  
155 quantified using real-time PCR (n=3-12). Gene expression was normalized to actin and expressed  
156 as fold change over untreated control samples.

157

**158 Figure E5.**

**159 Expression of periostin was not synergistically induced by combined treatment of Th2 and**  
**160 IL-17A in differentiated airway epithelial cells.**

161 Real-time PCR analysis of periostin expression in differentiated NECs stimulated with cytokines  
162 alone (10 ng/ml) or in combination (10 ng each) as indicated for 24 h. Shown is data from 6  
163 experiments.

164

**165 Figure E6.**

**166 Expression of pendrin was additively induced by combined treatment with IL-13 and IL-1 $\beta$**   
**167 in differentiated airway epithelial cells.**

168 Real-time PCR analysis of pendrin expression in differentiated NECs stimulated with cytokines  
169 alone (10 ng/ml) or in combination (10 ng each) as indicated for 24 h. Shown is data from 2  
170 experiments.

171

172



173

174 **REFERENCES**

175 E1. Lopez-Souza N, Avila PC, Widdicombe JH. Polarized cultures of human airway  
176 epithelium from nasal scrapings and bronchial brushings. *In Vitro Cell Dev Biol Anim*  
177 2003; 39:266-9.

178 E2. Peters AT, Kato A, Zhang N, Conley DB, Suh L, Tancowny B, et al. Evidence for altered  
179 activity of the IL-6 pathway in chronic rhinosinusitis with nasal polyps. *J Allergy Clin*  
180 *Immunol* 2010; 125:397-403 e10.

181 E3. Skubis-Zegadlo J, Nikodemska A, Przytula E, Mikula M, Bardadin K, Ostrowski J, et al.  
182 Expression of pendrin in benign and malignant human thyroid tissues. *Br J Cancer* 2005;  
183 93:144-51.

184 E4. Pedemonte N, Caci E, Sondo E, Caputo A, Rhoden K, Pfeffer U, et al. Thiocyanate  
185 transport in resting and IL-4-stimulated human bronchial epithelial cells: role of pendrin  
186 and anion channels. *J Immunol* 2007; 178:5144-53.

187

188

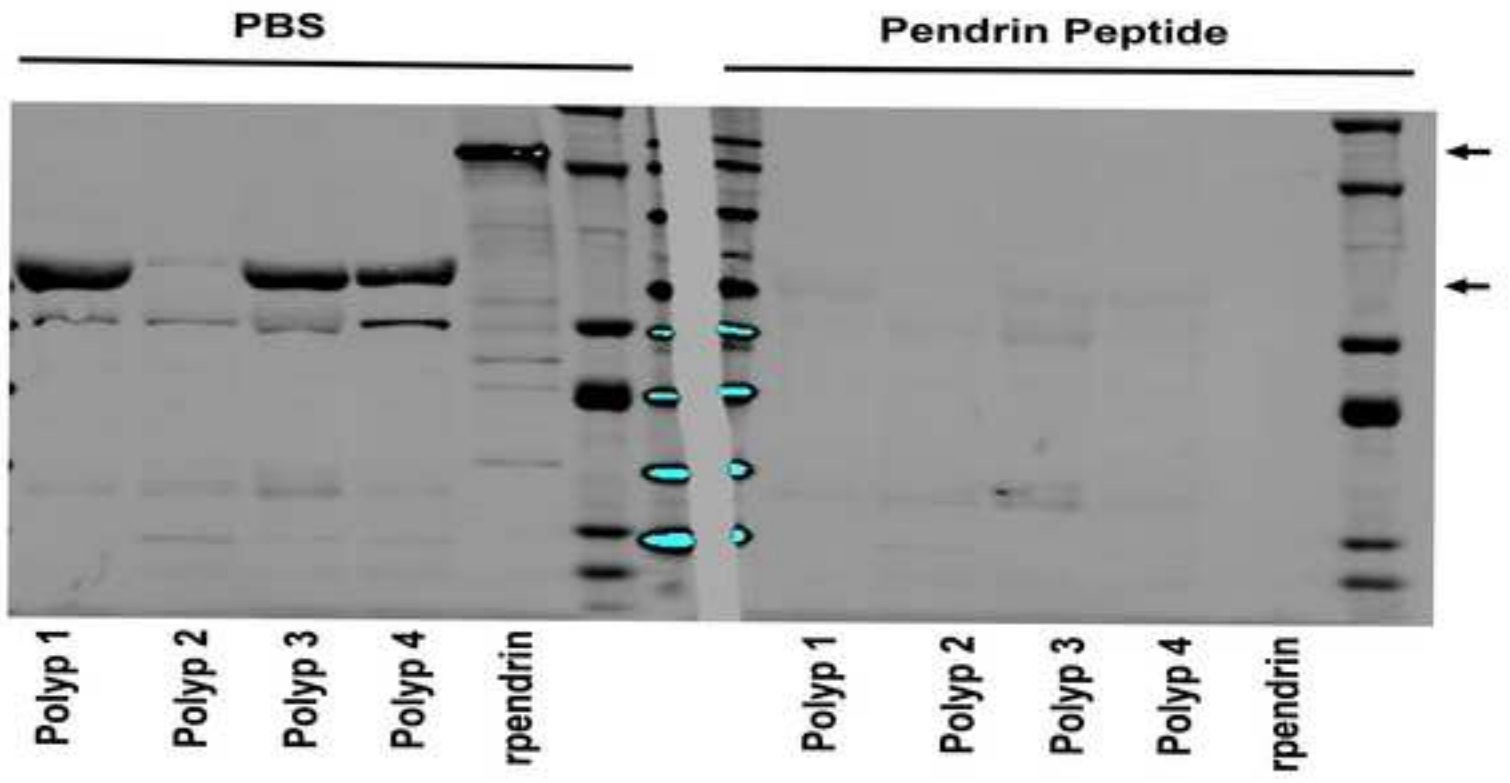

Seshadri Fig. E1

## Nasal Scrapings

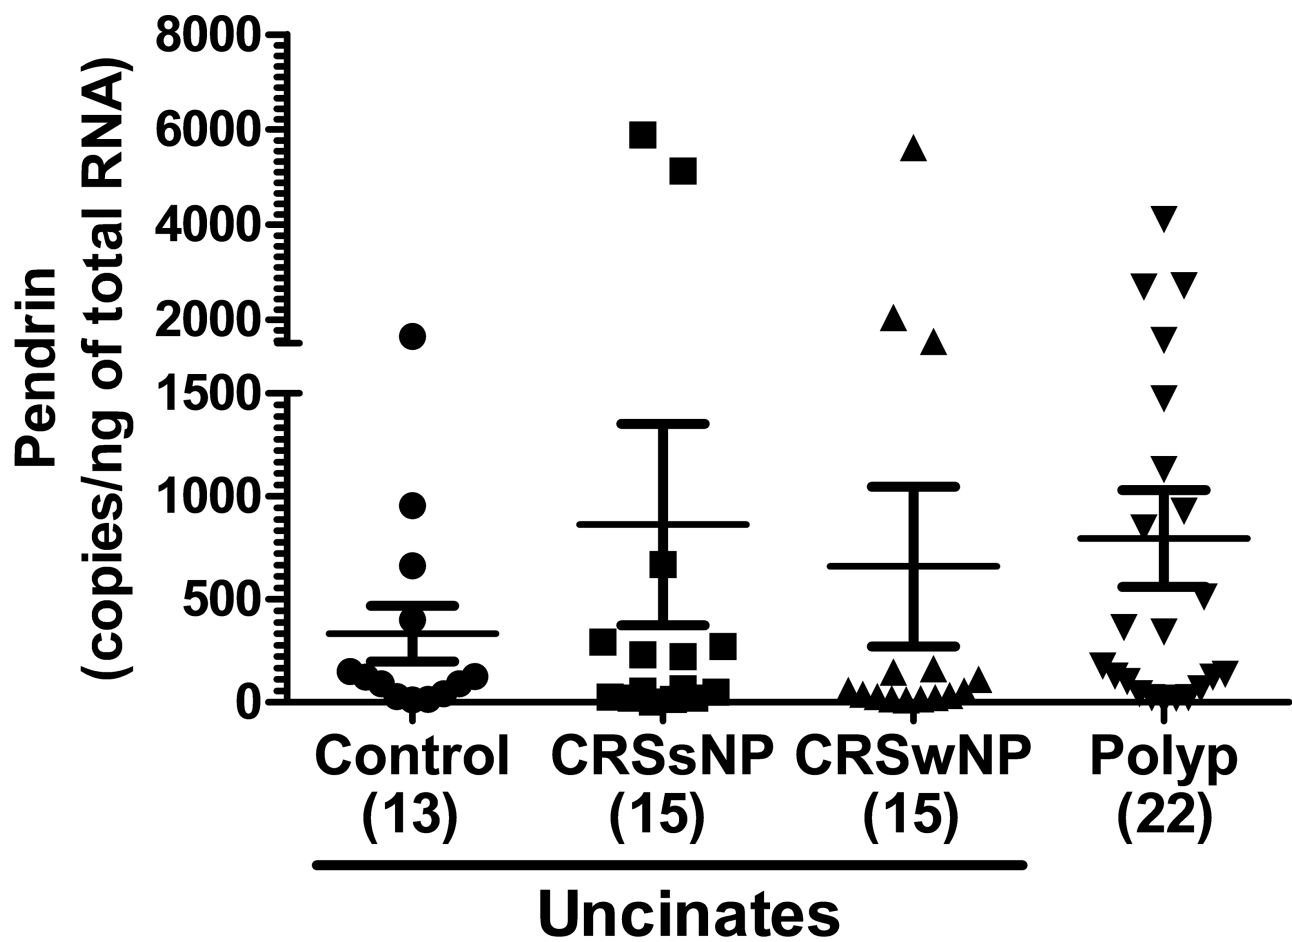

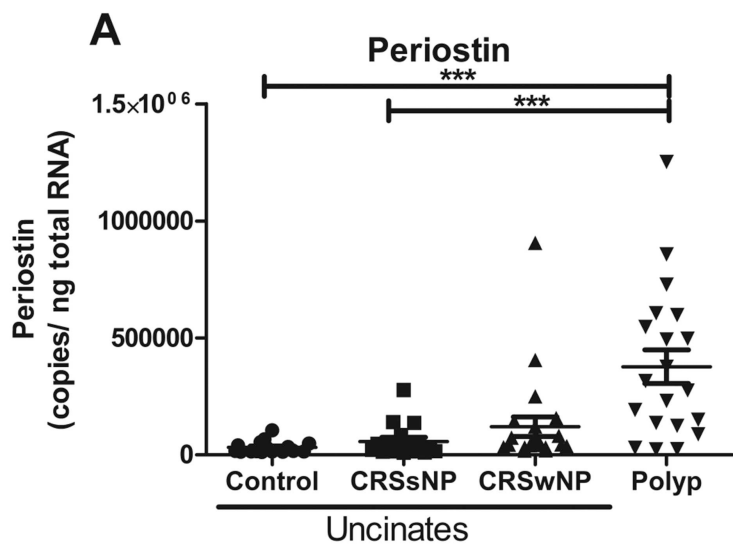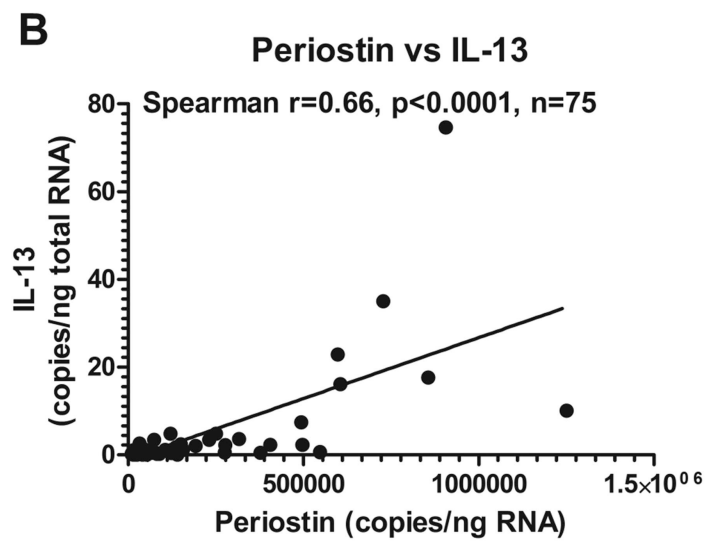

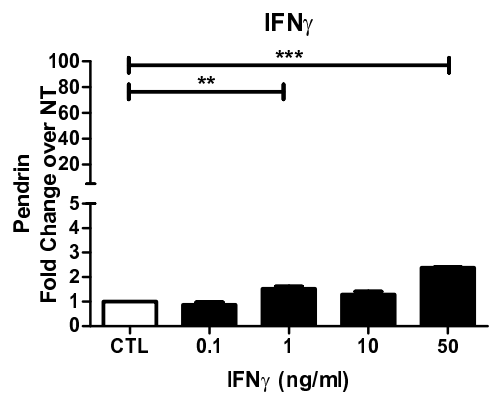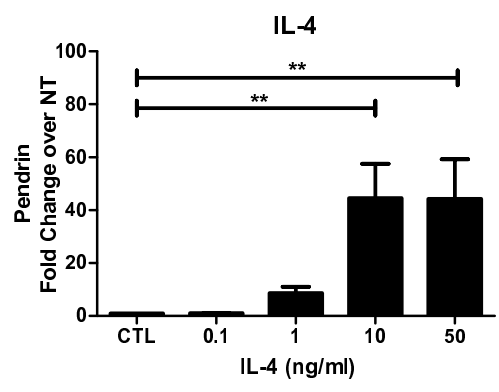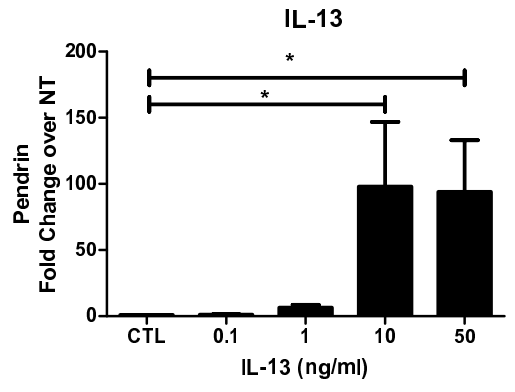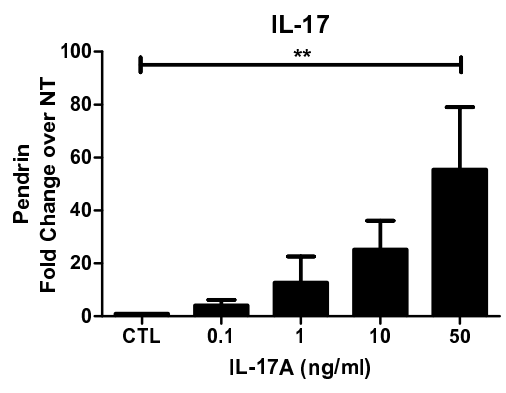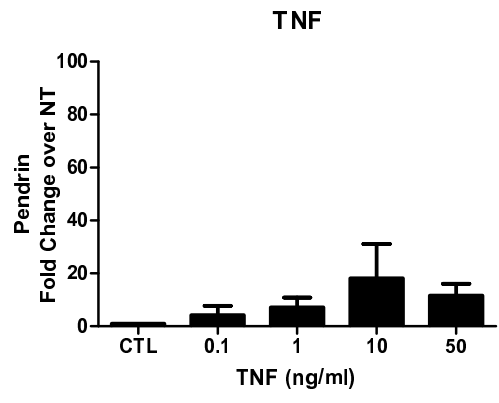

Seshadri Fig. E4

# RNA

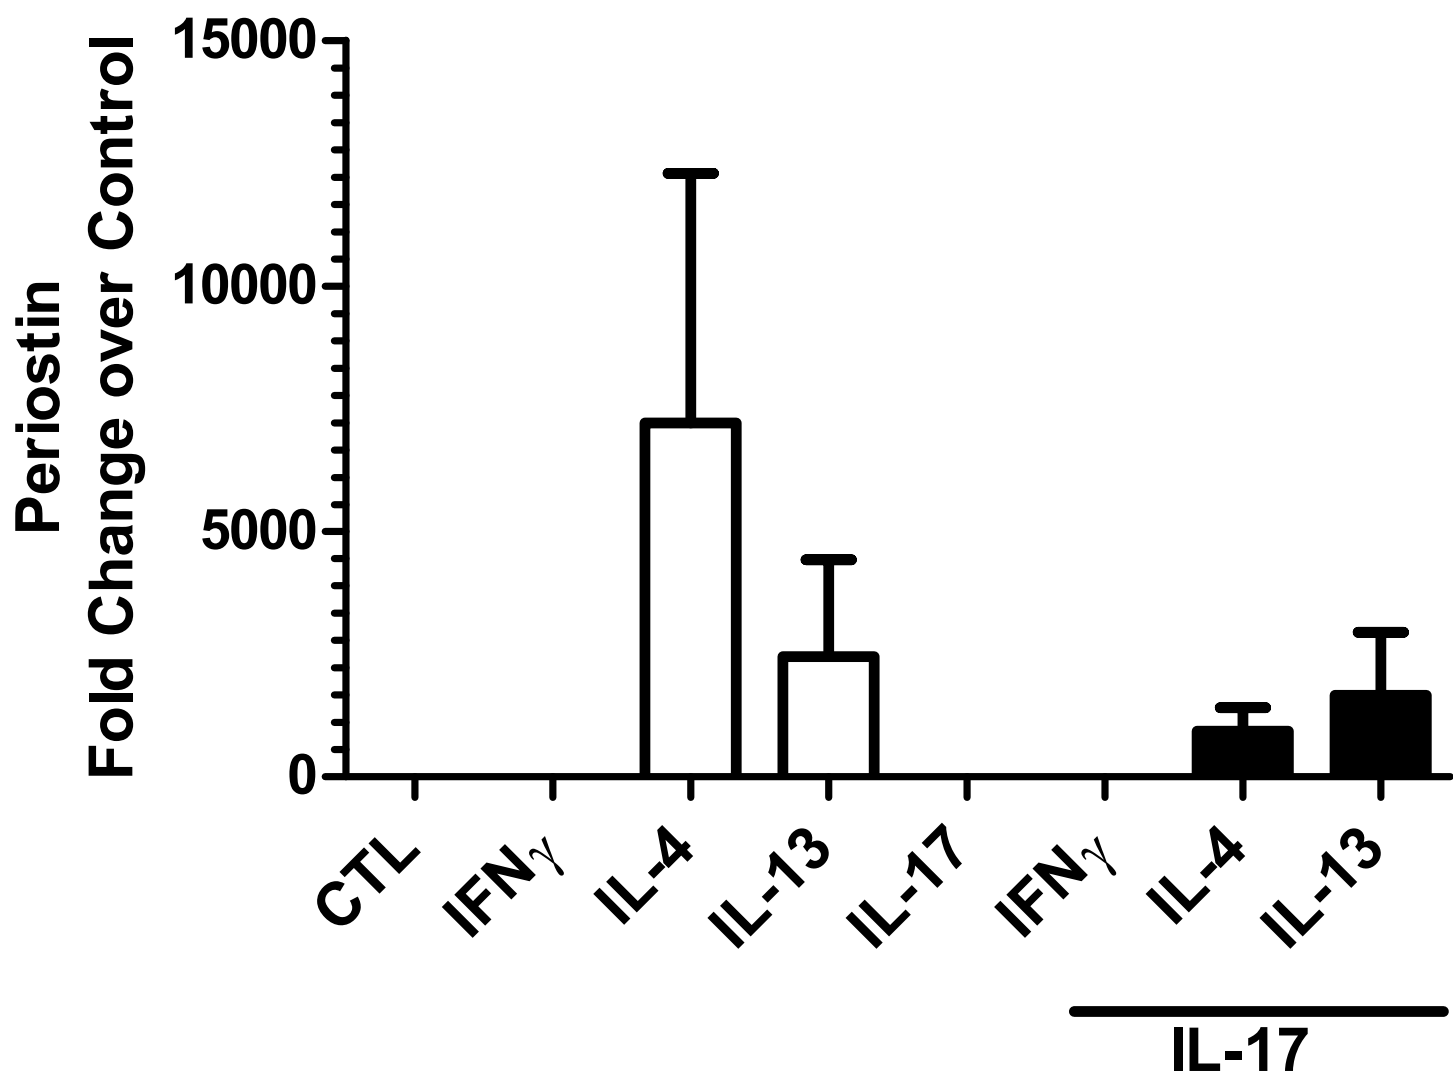

# RNA

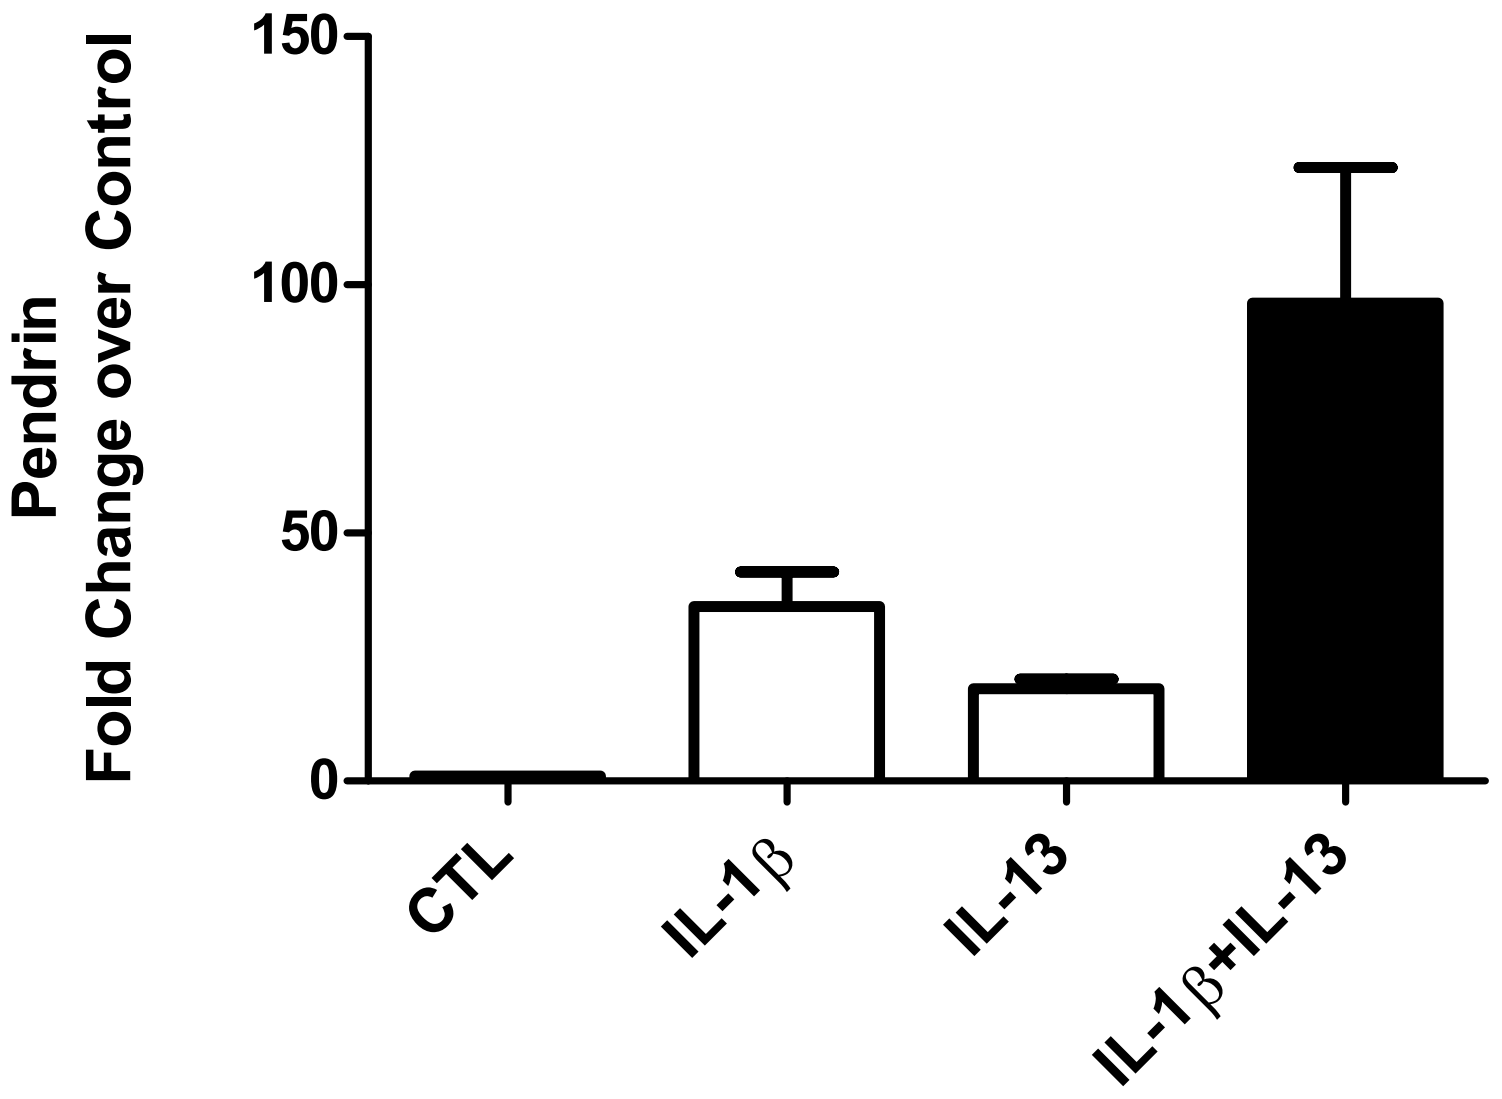

Supplement: NIHMS696735-supplement-01.pdf [file NIHMS696735-supplement-01.pdf]
